# Supplementary material for: ‘Ferroelectric’ metals reexamined: fundamental mechanisms and design considerations for new materials
Source: Royal Society of Chemistry journal article supplement (doi:10.1039/c5tc03856a), 2016-01-01
Supplement: c5tc03856a1.pdf [file c5tc03856a1.pdf]

# Supporting Information:

## ‘Ferroelectric’ Metals Reexamined: Fundamental Mechanisms and Design Considerations for New Materials

Nicole A. Benedek<sup>\*,†</sup> and Turan Birol<sup>‡</sup>

<sup>†</sup>*Department of Materials Science and Engineering, Cornell University, Ithaca, New York  
14853 USA*

<sup>‡</sup>*Department of Physics and Astronomy, Rutgers University, New Jersey 08854 USA*

E-mail: nbenedek@cornell.edu

Table 1: Comparison between calculated and experimental structural parameters of  $R\bar{3}c$   $\text{LiOsO}_3$  in the hexagonal setting. The calculated lattice parameters are  $a = 5.1091 \text{ \AA}$  and  $c = 13.0175 \text{ \AA}$ , compared with the experimental lattice parameters  $a = 5.0638 \text{ \AA}$  and  $c = 13.2110 \text{ \AA}$ . The calculated rotation angle for the  $\text{OsO}_6$  octahedra is  $23.9^\circ$ , compared with an experimental value of  $24.2^\circ$ . Experimental data are from Shi, *et al Nature Materials* **12** 1024 (2013).

| Atom | Wyckoff site | Theory |     |      | Experiment |     |      |
|------|--------------|--------|-----|------|------------|-----|------|
|      |              | $x$    | $y$ | $z$  | $x$        | $y$ | $z$  |
| Li   | 6a           | 0      | 0   | 0.25 | 0          | 0   | 0.25 |
| Os   | 6b           | 0      | 0   | 0    | 0          | 0   | 0    |
| O    | 18e          | 0.6277 | 0   | 0.25 | 0.6298     | 0   | 0.25 |

Table 2: Comparison between calculated and experimental structural parameters of  $R\bar{3}c$   $\text{LiOsO}_3$  in the hexagonal setting. The calculated lattice parameters are  $a = 5.0421 \text{ \AA}$  and  $c = 13.2470 \text{ \AA}$ , compared with the experimental lattice parameters  $a = 5.0456 \text{ \AA}$  and  $c = 13.2390 \text{ \AA}$ . Experimental reference as above.

| Atom | Wyckoff site | Theory |         |        | Experiment |         |        |
|------|--------------|--------|---------|--------|------------|---------|--------|
|      |              | $x$    | $y$     | $z$    | $x$        | $y$     | $z$    |
| Li   | 6a           | 0      | 0       | 0.2199 | 0          | 0       | 0.2147 |
| Os   | 6a           | 0      | 0       | 0.0057 | 0          | 0       | 0      |
| O    | 18b          | 0.6701 | -0.0311 | 0.2582 | 0.6260     | -0.0102 | 0.2525 |
